# Supplementary material
Source: PubMed Central journal article supplement (PMC7254883)
Supplement: NIHMS1585813-supplement-1.pdf [file NIHMS1585813-supplement-1.pdf]

Figure S1

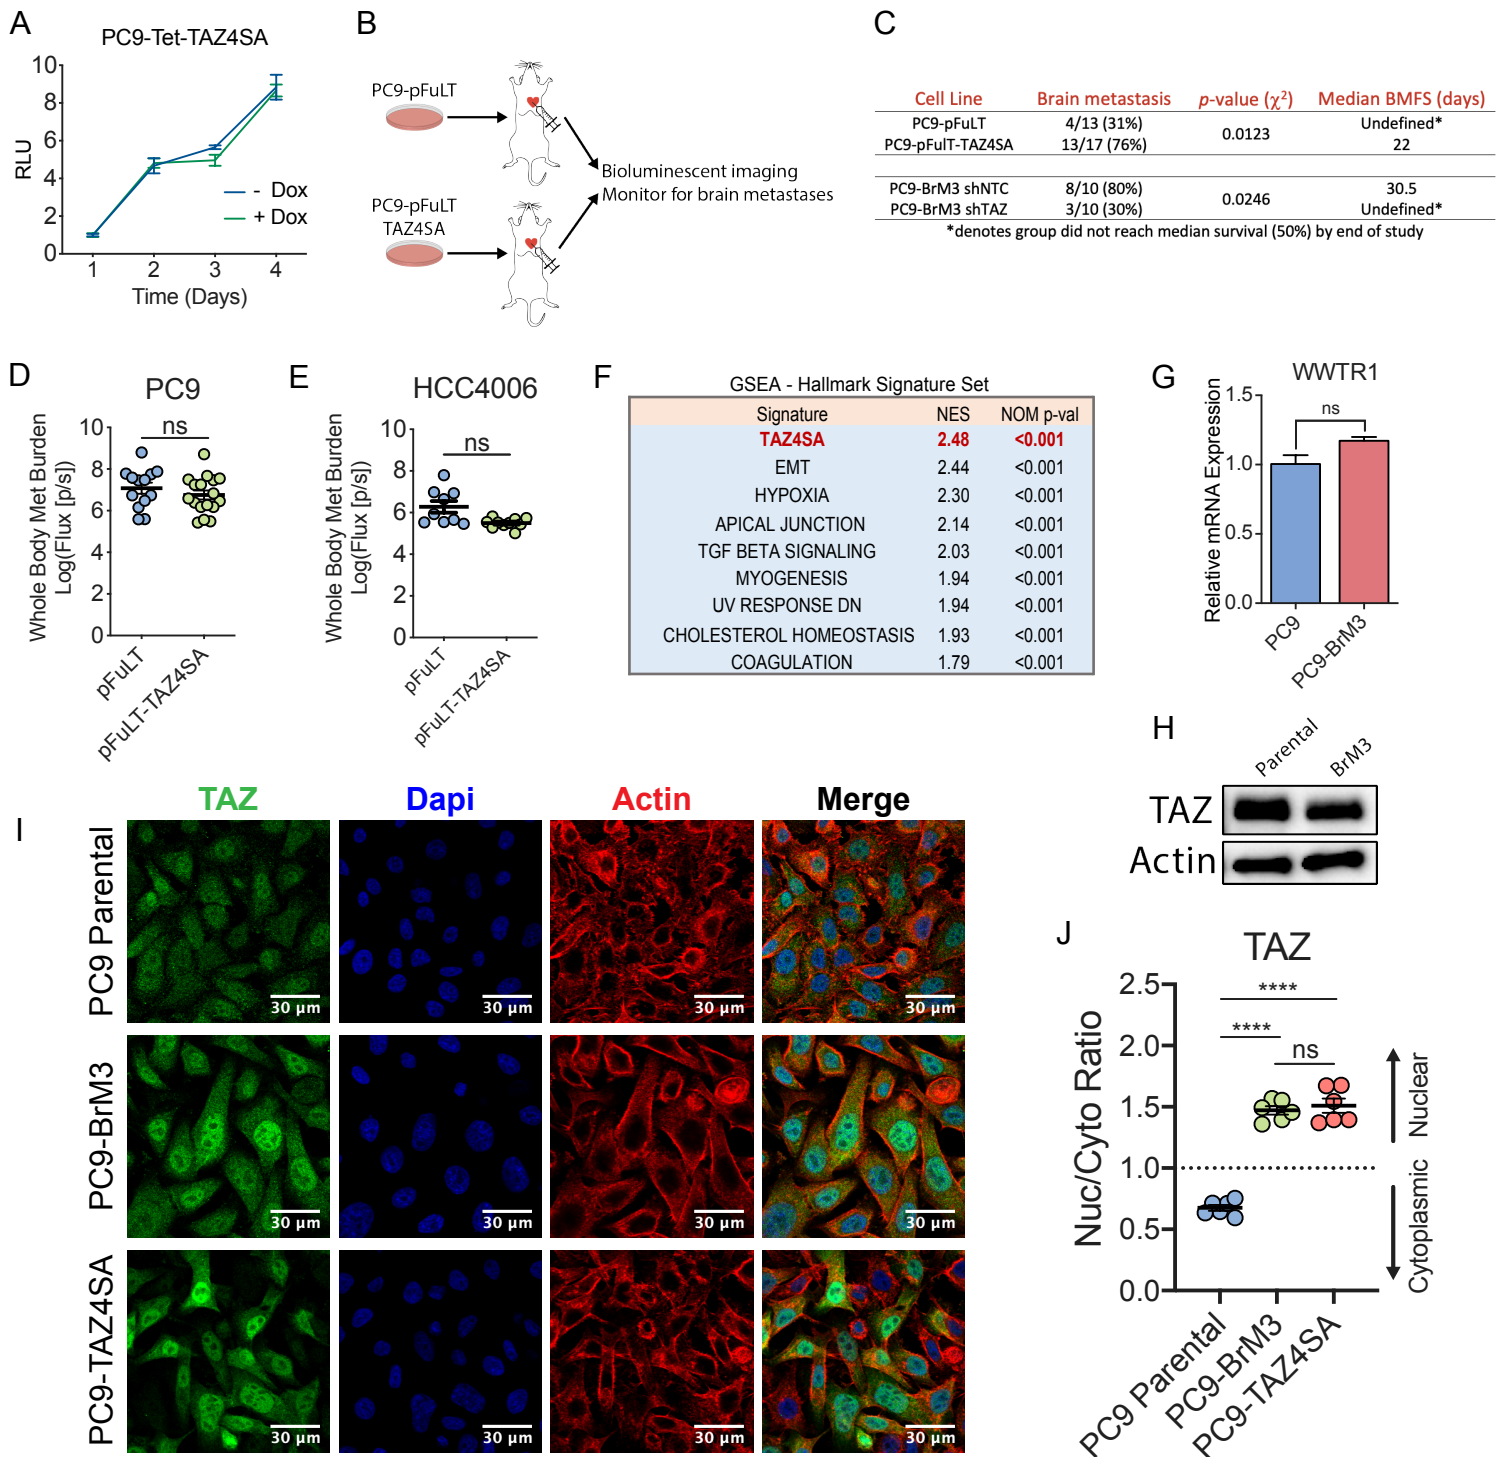

**Supplemental Figure S1. Active TAZ promotes brain metastasis and TAZ nuclear accumulation is enhanced in brain metastatic lung adenocarcinoma cells. Related to Figure 1.** **A)** Cell-Titer Glo assay measuring cell viability of PC9-Tet-TAZ4SA cells treated +/- dox in 2D culture (n=5). Error bars represent the mean +/- SEM. **B)** Schematic of study design to measure brain metastasis in pFuLT parental vs pFuLT-Tet-TAZ4SA-expressing lung cancer cells. **C)** Table comparing percentages of brain metastasis-bearing mice between experimental groups; p-values calculated by Chi-square test. **D-E)** Quantification of whole-body metastatic burden in mice injected with **D)** PC9-pFuLT (n=13) vs PC9-pFuLT-Tet-TAZ4SA (n=17) cells or **E)** HCC4006-pFuLT (n=9) vs HCC4006-pFuLT-Tet-TAZ4SA (n=10) cells. **F)** Table of TAZ4SA gene signature and other top PC9-BrM3-enriched signatures of the Hallmark signature gene set from mSigDB. **G)** RT-qPCR of *WWTR1* mRNA (n=3) and **H)** immunoblot analysis of TAZ protein in PC9 parental vs PC9-BrM3 cells. **I)** Representative immunofluorescence images and **J)** quantification of TAZ nuclear/cytoplasmic ratio in the indicated cell lines. TAZ4SA was used as positive control for nuclear TAZ. Statistical analysis conducted by one-way ANOVA followed by Fisher post-hoc testing (n=6); \*\*\*\* indicates p-value < 0.0001, ns=non-significant. Error bars represent the mean +/- SEM.

Figure S2

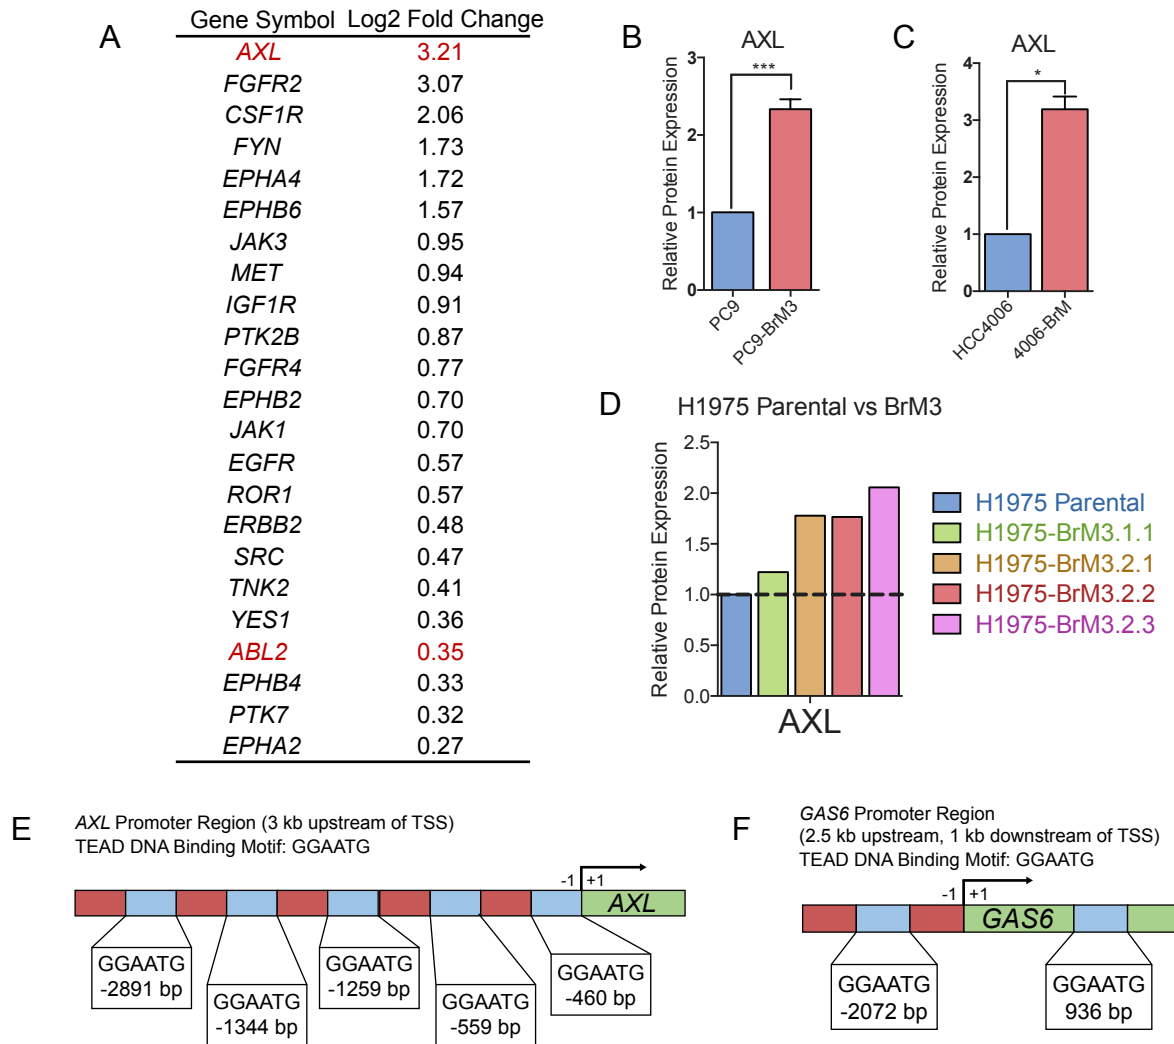

**Supplemental Figure S2. Expression of the AXL receptor tyrosine kinase is upregulated in brain-metastatic lung cancer cells. Related to Figure 2. A)** Table depicting top 23 kinases whose mRNA expression is upregulated in PC9-BrM3 cells. **B-C)** Quantification of AXL protein expression in **B)** PC9 parental vs PC9-BrM3 (n=3) or **C)** HCC4006 parental vs HCC4006-BrM cells (n=3). Data corresponds to representative immunoblots shown in main Figure 2E. **D)** Relative protein expression of AXL in H1975 parental and H1975-BrM3 cell lines derived from independent mice. Protein expression normalized to actin loading control. **E)** Diagram depicting TEAD DNA binding motifs upstream of the *AXL* transcriptional start site (TSS). **F)** Diagram depicting TEAD DNA binding motifs nearest the *GAS6* TSS; \* p-value < 0.05, \*\*\* p-value < 0.001. Error bars represent the mean +/- SEM.



Figure S3

| Prediction Algorithm/Model                   | ABL001 | GNF-5 | R428   | TP-0903 | Paclitaxel | Docetaxel |
|----------------------------------------------|--------|-------|--------|---------|------------|-----------|
| AdaBoost_MACCSFP BBB Score (>0 is BBB+)      | 4.196  | 3.296 | 3.941  | 1.109   | -5.055     | -4.466    |
| AdaBoost_OpenbabelFP2 BBB Score (>0 is BBB+) | 8.366  | 12.66 | 24.351 | 7.282   | -9.163     | -8.039    |
| AdaBoost_Molprint2DFP BBB Score (>0 is BBB+) | 5.122  | 4.491 | 5.946  | -173.76 | -0.497     | -0.497    |
| AdaBoost_PubChemFP BBB Score (>0 is BBB+)    | 13.64  | 16.63 | 14.52  | 9.66    | -12.445    | -8.266    |
| SVM_MACCSFP BBB Score (>0.02 is BBB+)        | 0.024  | 0.06  | 0.051  | 0.032   | -0.234     | -0.213    |
| SVM_OpenbabelFP2 BBB Score (>0 is BBB+)      | 0.066  | 0.15  | -0.066 | 0.187   | -0.188     | -0.206    |
| SVM_Molprint2DFP BBB Score (>0 is BBB+)      | 0.414  | 0.453 | 0.348  | 0.681   | 0.333      | 0.403     |
| SVM_PubChemFP BBB Score (>0 is BBB+)         | 0.081  | 0.086 | 0.087  | 0.144   | -0.528     | -0.522    |

**Supplemental Figure S3. Computational modeling predicts small molecule inhibitors of the ABL and AXL protein tyrosine kinases are blood-brain barrier penetrant. Related to Figure 6.** Blood-brain barrier (BBB) permeability prediction algorithm scores for indicated small molecule inhibitors against the ABL kinases (ABL001 and GNF-5), or AXL (R428, also known as BGB324, and TP-0903). Paclitaxel and Docetaxel included as negative controls (non-BBB penetrant). CBLigand database was used for prediction modeling (<https://www.cbligand.org/BBB/>).

Figure S4

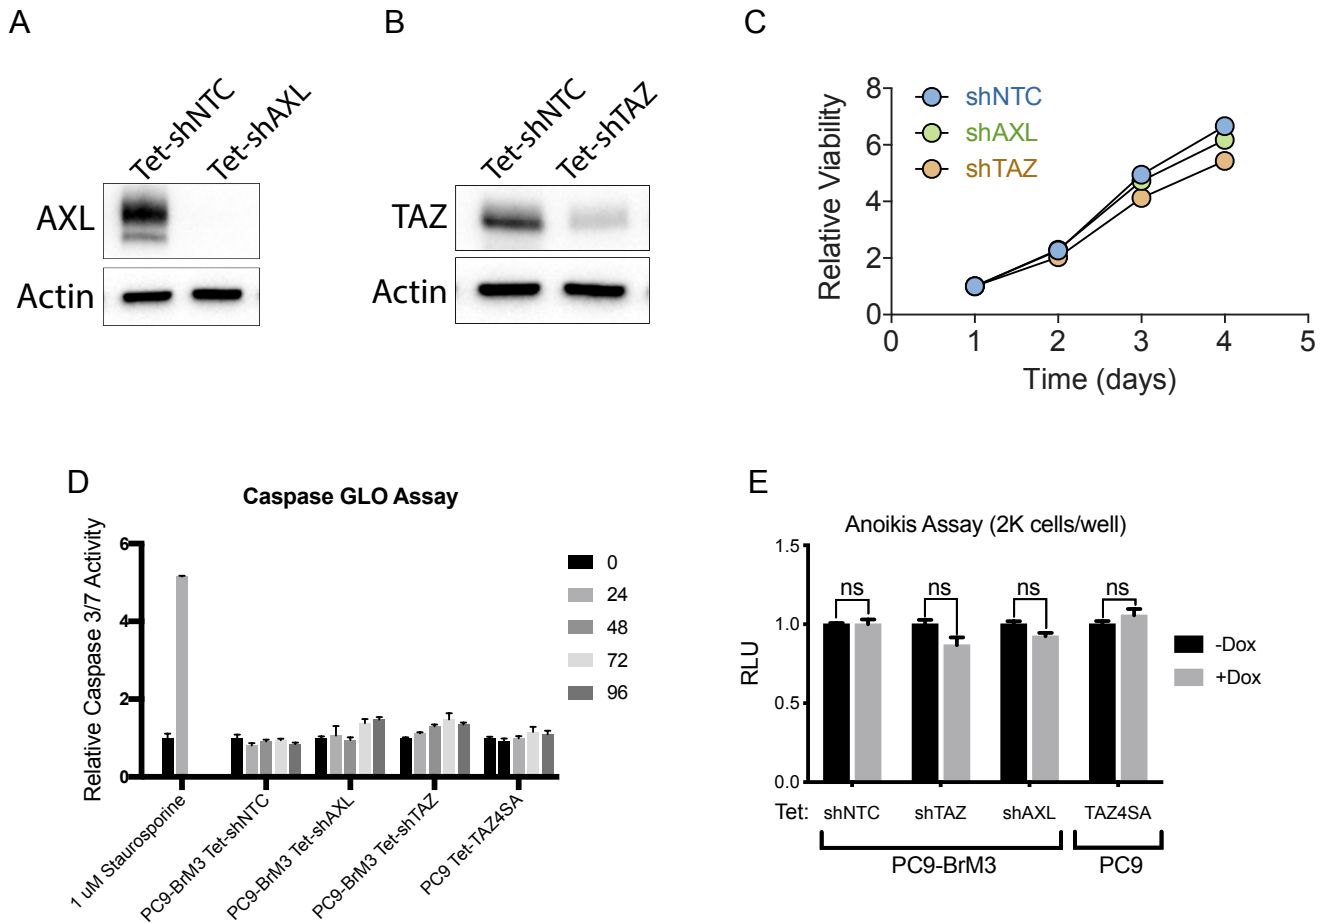

**Supplemental Figure S4. Depletion of AXL and TAZ signaling does not influence cell proliferation, apoptosis, or anoikis of brain-metastatic lung cancer cells. Related to Figure 6.** **A)** Immunoblots of the indicated proteins in PC9-BrM3 cells transduced with dox-inducible shNTC or shAXL and treated with 500 ng/mL dox for 72 h. **B)** Immunoblots of PC9-BrM3 cells transduced with dox-inducible sh-shNTC or shTAZ and treated with 500 ng/mL dox for 72 h. **C)** CellTiter GLO assay measuring cell viability in PC9-BrM3 cells transduced with stable shNTC, shAXL, or shTAZ; n=8 technical replicates. **D)** Caspase-GLO assay measuring relative Caspase 3/7 activity in PC9-BrM3 cells transduced with the indicated dox-inducible lentiviral shRNAs or PC9 parental cells lentivirally transduced with Tet-TAZ4SA expression vector. Cells transduced with inducible constructs were treated with 500 ng/mL dox for the indicated timepoints (in hours). Dox and fresh media were replaced every 24 h prior to assay. PC9-BrM3 cells treated with 1  $\mu$ M staurosporine for 24 h were used as a positive control. Error bars represent mean  $\pm$  SEM from two independent experiments. **E)** Anoikis assay in PC9-BrM3 cells transduced with the indicated dox-inducible lentiviral shRNAs or PC9 parental cells lentivirally transduced with Tet-TAZ4SA expression vector. Cells transduced with inducible constructs were seeded in ultra-low attachment 96-well plates and were treated with or without 500 ng/mL dox for 72 h. RLU=relative luminescent units. Statistical analysis performed by one-way ANOVA with Tukey post-hoc testing (n=5); ns = not significant.

Figure S5

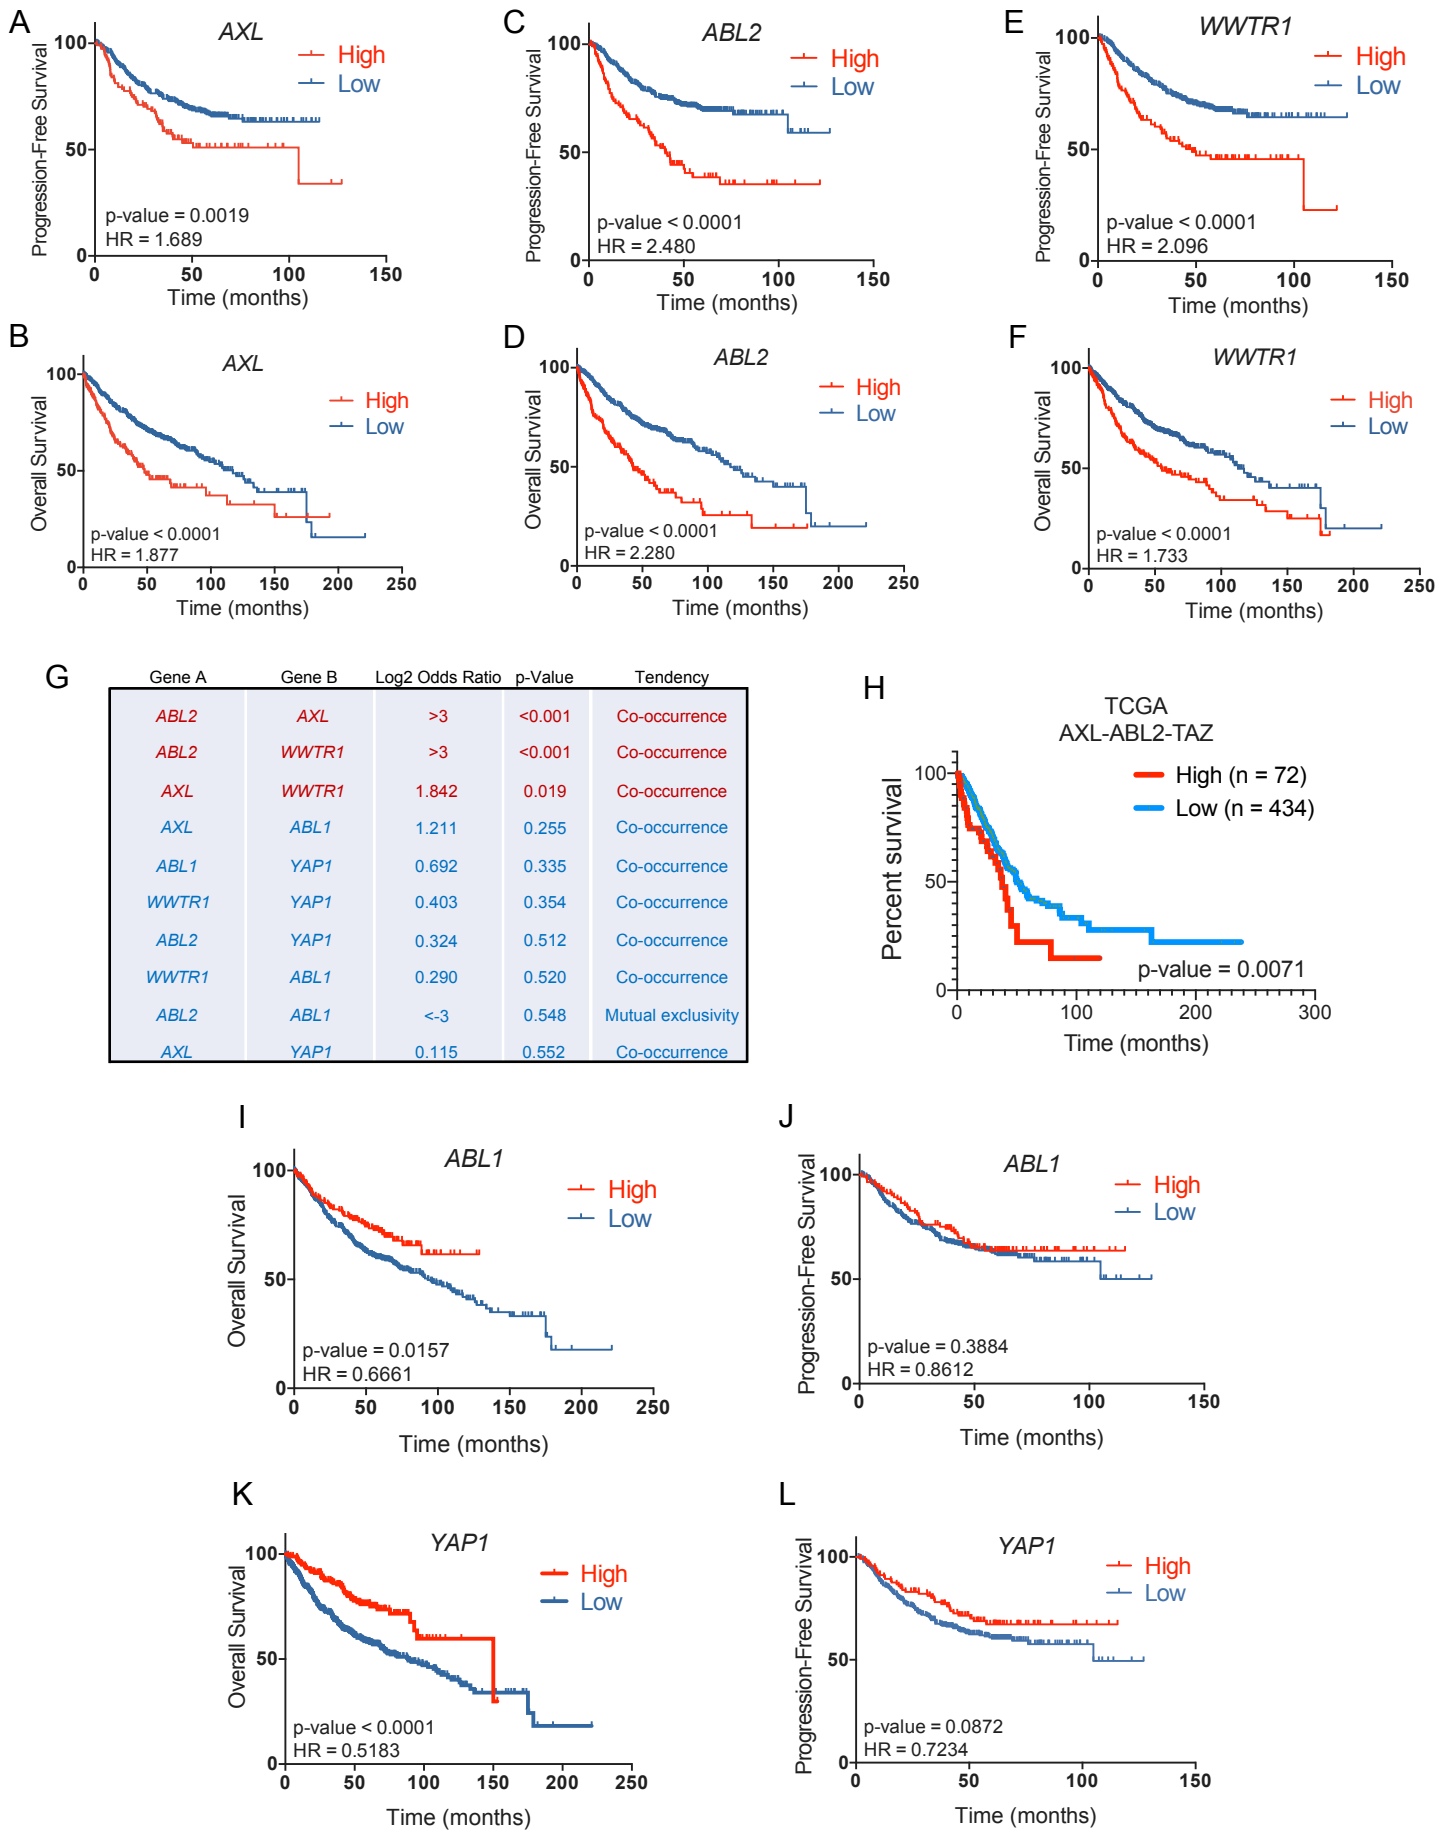

**Supplemental Figure S5. High expression of *ABL2*, *AXL*, and *WWTR1*, but not *ABL1* or *YAPI*, correlates with poor survival outcomes in human lung adenocarcinoma patients. Related to Figure 6. A-F) OS and progression-free survival (PFS) curves derived from human lung adenocarcinoma patient microarray datasets with high versus low expression of *AXL* (A-B), *ABL2* (C-D) or *WWTR1* (E-F). Curves were generated using KMPlot analysis tool. For OS, patients were stratified into high (upper quartile,  $n = 180$  patients) vs low (bottom three quartiles,  $n = 540$  patients) expression for the indicated genes. For PFS, patients were stratified into high (upper quartile,  $n = 114$  patients) vs low (bottom three quartiles,  $n = 347$  patients) expression. G) Mutual exclusivity analysis of *AXL*, *ABL1*, *ABL2*, *WWTR1*, and *YAPI* combined mRNA and protein expression in lung adenocarcinoma patients from the TCGA Provisional dataset. Data analyzed using the cBioPortal online analysis software. H) Kaplan-Meier analysis of OS in TCGA patient dataset for lung adenocarcinoma patients with high expression of *AXL*, *ABL2* and *TAZ*. I-L) OS or PFS in lung adenocarcinoma patients stratified by high vs. low mRNA expression of *ABL1* (I-J) or *YAPI* (K-L) using KMPlot analysis tool. Patients were stratified into high (upper quartile,  $n = 180$  patients) vs low (bottom three quartiles,  $n = 540$  patients) expression for the indicated genes. For PFS curves, patients were also stratified into high (upper quartile,  $n = 114$  patients) vs low (bottom three quartiles,  $n = 347$  patients) expression. For all survival curves, statistical analysis performed by Log-rank (Mantel-Cox) test.**

Figure S6

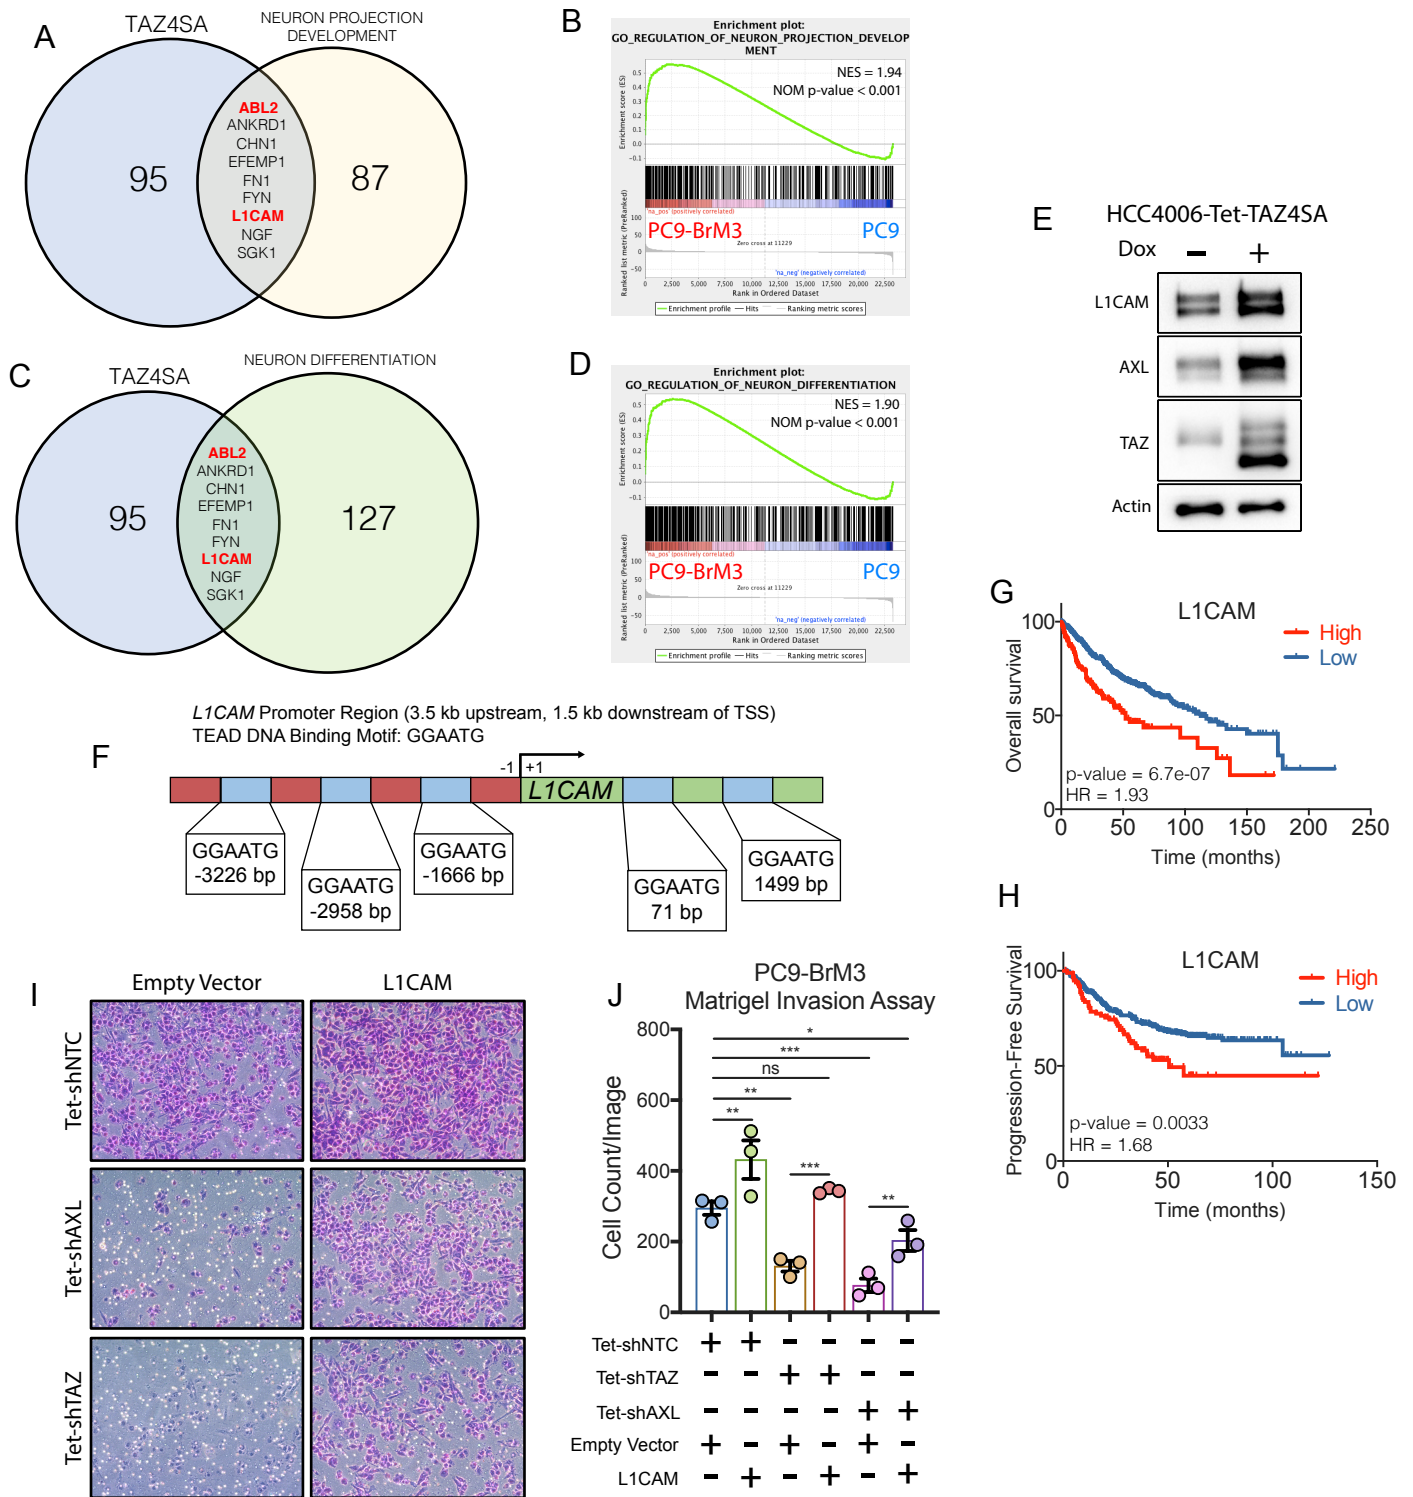

**Supplemental Figure S6. Comparative analysis of gene expression data reveals TAZ-dependent expression of neuronal signatures including *L1CAM* which drives a pro-invasive phenotype in brain-metastatic lung cancer cells. Related to Figure 7. A-D)** Venn diagrams and corresponding GSEA plots of overlapping transcripts upregulated in the TAZ4SA GSEA signature and signatures for **A-B)** neuron projection development and **C-D)** neuron differentiation. Signatures were gathered from the Gene Ontology signature set available through mSigDB (The Broad Institute). **E)** Immunoblots of HCC4006-Tet-TAZ4SA cells treated with or without 500 ng/mL dox for 5 days. **F)** Diagram depicting TEAD DNA binding motifs in proximal and distal sequences of the *L1CAM* TSS. **G-H)** Kaplan-Meier analysis of **H)** OS (high  $n = 172$ , low  $n = 548$ ) and **I)** PFS (high  $n = 100$ , low  $n = 361$ ) in patients with high vs low mRNA expression of *L1CAM*. Statistical analysis performed by Log-rank (Mantel-Cox) test. **I)** Representative images and **J)** quantification of matrigel invasion assay in PC9-BrM3 cells transduced with dox-inducible shNTC, shAXL, or shTAZ as well as stable expression through lentiviral transduction of empty vector control or *L1CAM* cDNA. Cells from eight non-overlapping images per condition from three independent experiments were counted and the means from each condition were graphed. Statistical analysis performed by one-way ANOVA with Fisher post-hoc testing. Error bars represent mean  $\pm$  SEM. ns = non-significant, \* p-value < 0.05, \*\* p-value < 0.01, \*\*\* p-value < 0.005.



Supplemental Table S1. Gene List for TAZ4SA Signature. Related to Figure 1.

|           |          |              |            |               |
|-----------|----------|--------------|------------|---------------|
| F3        | SGK1     | RELB         | GLIS3      | PSG1          |
| FN1       | FSTL3    | FA2H         | ANKRD2     | IL6           |
| THBS1     | EEF1A2   | HLA-B        | C4orf19    | APLN          |
| IGFBP3    | LATS2    | CSRNP1       | DYRK3      | CYP4V2        |
| PTRF      | HEG1     | PLCXD2       | LANCL3     | VANGL2        |
| WWTR1     | MAOA     | CCRN4L       | EFEMP1     | SCG2          |
| CYR61     | RBMS2    | BMP4         | ADAMTS6    | TAGLN         |
| CRIM1     | C1orf116 | ATF3         | TMEM52B    | DUSP8         |
| EXT1      | NFKB2    | SFTA1P       | HES7       | SERTAD4-AS1   |
| AXL       | LIFR     | CORO6        | SLC7A7     | TMCC2         |
| EPB41L2   | RN7SL1   | ZNF462       | ECM1       | TRPM2         |
| PLK2      | DUSP1    | MOB3B        | HECTD2     | SAA1          |
| TNIP1     | BIRC3    | ARHGAP22     | SLFN12     | MYCL          |
| UGCG      | ADM      | PAPSS2       | B4GALNT3   | NAV3          |
| ABL2      | CR2      | CHIC2        | TLR2       | MMP19         |
| OLR1      | TFPI2    | CDH13        | MCOLN3     | PHACTR3       |
| SAV1      | CDKN1A   | GNB4         | SYNPO      | C6orf15       |
| ETS1      | EGR1     | HSD3B1       | MFAP5      | SLC16A10      |
| ANKRD1    | IGFN1    | MATN3        | COL4A4     | HLA-F         |
| MAP3K14   | MITF     | MAPRE2       | STK33      | RP11-173M1.8  |
| GABARAPL1 | L1CAM    | RAB30        | CNKSR2     | LHX4          |
| MARCH4    | SNAI2    | GADD45B      | UST        | CTGF          |
| TUFT1     | MFGE8    | EDN1         | OSBPL6     | C4BPB         |
| AMOTL2    | SGPP2    | TRIM17       | ARL4D      | HPCAL4        |
| FYN       | HDAC9    | STYK1        | AC002480.3 | TCF7L1        |
| GADD45A   | CST6     | DAB2         | SYNGR3     | PSG5          |
| ICAM1     | GPR176   | TNFSF15      | MIR503HG   | AASS          |
| SLC2A3    | GAS6     | NGF          | MT-TT      | RP11-248J18.2 |
| FAM126A   | MYBL1    | IQCJ-SCHIP1  | GLI2       | VSTM1         |
| MAPK8     | FBXO32   | TMEM40       | LINC00707  | IL32          |
| CITED2    | NUAK2    | STOM         | CHN1       | TNFRSF9       |
| GJC1      | ARHGEF26 | KRT34        | CDK14      | BTG2          |
| SRGN      | DNAJC6   | HHAT         | MT-TI      | HCP5          |
| PPP1R15A  | TMEM45A  | PAX9         | SCML2      | PLAGL1        |
| SLC26A2   | GLIS2    | RP11-145M9.4 | DYRK1B     | KRTAP2-3      |
| TNC       | A4GALT   | SH2D5        | ZBED2      | DUSP9         |
| RN7SL2    | OSR2     | PRR5L        | HTRA3      | FLJ00418      |
| CD55      | COL5A1   | AGPAT4       | PTPRB      | KRT4          |
| SERTAD4   | RAB3B    | HSPB8        | FGF1       | RNF125        |
| AJUBA     | EMB      | ST3GAL6      | BRSK1      | PSG9          |

Supplemental Table S2. List of primers and oligonucleotides. Related to Key Resources Table.

| <b>Primer (Application)</b>  | <b>Source</b> | <b>Oligo Sequence</b>                     |
|------------------------------|---------------|-------------------------------------------|
| 18S-F (RT-qPCR)              | Sigma         | GAGGATGAGGTGGAACGTGT                      |
| 18S-R (RT-qPCR)              | Sigma         | AGAAGTGACGCAGCCCTCTA                      |
| AXL-F (RT-qPCR)              | Sigma         | GTGGGCAACCCAGGGAATATC                     |
| AXL-R (RT-qPCR)              | Sigma         | GTA CTGTCCCGTGT CGGAAAG                   |
| ABL1-F (RT-qPCR)             | Sigma         | AAGCCGCTCGTTGGA ACTC                      |
| ABL1-R (RT-qPCR)             | Sigma         | AGACCCGGAGCTTTTCACCT                      |
| ABL2-F (RT-qPCR)             | Sigma         | GTTGAACCC CAGGCACTAAAT                    |
| ABL2-R (RT-qPCR)             | Sigma         | CAACGAAGAGATTAGGGTCACTC                   |
| GAS6-F (RT-qPCR)             | Sigma         | GCAAAACCTGCCTGACCAGT                      |
| GAS6-R (RT-qPCR)             | Sigma         | TTCGTTGACATCTTTGTGCGCA                    |
| L1CAM-F (RT-qPCR)            | Sigma         | TGTCATCACGGAACAGTCTCC                     |
| L1CAM-R (RT-qPCR)            | Sigma         | CTGGCAAAGCAGCGGTAGAT                      |
| WWTR1-F (RT-qPCR)            | Sigma         | GATCCTGCCGGAGTCTTTCTT                     |
| WWTR1-R (RT-qPCR)            | Sigma         | CACGTCGTAGGACTGCTGG                       |
| ABL2 ChIP-F                  | Sigma         | GGCTGGGAGGGAGAGACC                        |
| ABL2 ChIP-R                  | Sigma         | ATTGAAGCCGGTCTCTGTGG                      |
| UTR ChIP-F                   | Sigma         | GAGAAACCACAGAGCACCCA                      |
| UTR ChIP-R                   | Sigma         | GGCGCC CAGGGTGATTTTTA                     |
| TAZ Y321F FWD (mutagenesis)  | Sigma         | TTGTGGGGACACTGAAGCACCTAACCCC              |
| TAZ Y321F REV (mutagenesis)  | Sigma         | GGGGTTAGGTGCTTCAGTGTCCCCACAA              |
| AXL Y779F FWD (mutagenesis)  | Sigma         | ACATCAAGGCAAACAGTCCATCCAGACAGTCC          |
| AXL Y779F REV (mutagenesis)  | Sigma         | GGA CTGTCTGGATGGACTGTTTGCCTTGATGTC        |
| AXL Y821F FWD (mutagenesis)  | Sigma         | ATCCATGTTGACAAAGAGGATTTTCGTCAGGCTCC       |
| AXL Y821F REV (mutagenesis)  | Sigma         | GGAGCCTGACGAAATCCTCTTTGTCAACATGGAT        |
| AXL Y830F FWD (mutagenesis)  | Sigma         | GGGGTTCAGGAAAACCTCCACCCTCATCC             |
| AXL Y830F REV (mutagenesis)  | Sigma         | GGATGAGGGTGGAGGTTTTCTGAACCCC              |
| AXL Y866F FWD (mutagenesis)  | Sigma         | CATCCTGCTGGACGCTTTGTCTCTGCC               |
| AXL Y866F REV (mutagenesis)  | Sigma         | GGCAGAGGACAAAGCGTCCAGCAGGATG              |
| ABL2 R198K FWD (mutagenesis) | Sigma         | GCTGCTCTCACTCTCTTTGACCAGGAAGCTGCCG        |
| ABL2 R198K REV (mutagenesis) | Sigma         | GCGGCAGCTTCCTGGTCAAAGAGAGTGAGAGCAGC       |
| ABL2 K317M FWD (mutagenesis) | Sigma         | CTTCCTTCAGTGT CATCACAGCCACTGTAAGGCTGTACTT |
| ABL2 K317M REV (mutagenesis) | Sigma         | AAGTACAGCCTTACAGTGGCTGTGATGACACTGAAGGAAG  |
